# Supplementary material for: Isolation and Characterization of Nitrate-Reducing Bacteria as Potential Probiotics for Oral and Systemic Health
Source: Front Microbiol. 2020 Sep 15;11:555465. doi: 10.3389/fmicb.2020.555465 (PMC7522554; doi:10.3389/fmicb.2020.555465)
Supplement: Supplementary file 3 [file Data_Sheet_2.xlsx]

## Sheet: Hoja1
Supplementary spreadsheet from: Rosier et al. (2020). Isolation and characterization of nitrate-reducing bacteria as potential probiotics for oral and systemic health.
		Nitrate and nitrite metabolism													Mb binding protein + Molybdopterins									Lactate metabolism
		narG	narY	narX1	narX2	aniA	narK2	narK2-2	nirD/nasE	nirB/nasD	norB	hmp	COG0778	yodC	modA	moaB	moaE2-1	moaE2-2	mobA	mog	moeA	moeB	mopII	ldh2	lldD	lutA	lutB	lutC	lutP	LctP	LctP-1	LctP-2	LctP-3	ilvH	ilvB1	alsD
	Species	nitrate reductase alpha subunit	respiratory nitrate reductase 2 beta chain	nitrate/nitrite sensor		copper nitrite reductase	nitrite/nitrate transporter		nitrite reductase (NADH) small subunit	nitrite reductase (NADH) large subunit	nitric oxide reductase subunit B	Flavohemoprotein	Putative NAD(P)H nitroreductase	Putative NAD(P)H nitroreductase	Molybdate-binding protein	Molybdenum cofactor biosynthesis protein B	Molybdopterin molybdenumtransferase 2 subunit 1	Molybdopterin molybdenumtransferase 2 subunit 2	Molybdenum cofactor guanylyltransferase	molybdopterin adenyltransferase	Molybdopterin molybdenumtransferase	Molybdopterin-synthase adenylyltransferase	Molybdenum-pterin-binding protein 2	L-lactate dehydrogenase 2	IL-lactate dehydrogenase	Lactate utilization protein A	Lactate utilization protein B	Lactate utilization protein C	L-lactate permease	L-lactate permease	L-lactate permease	L-lactate permease	L-lactate permease	Acetolactate synthase small subunit	Acetolactate synthase large subunit IlvB1	Alpha-acetolactate decarboxylase
D1P7	R. aeria	3723	1614	750	840	3000	1230	1224	339	2688	2412	1169	660	-	813	-	1380	489	618	519	1227	-	213	960	1239	792	1623	645	-	-	1662	1662	-	501	1821	750
D1P10	R. dentocariosa	3723	1614	834	747	2946	1245	-	342	2688	2412	1169	660	639	825	519	489	1380	690	-	1269	-	213	960	1239	792	1623	648	1674	1659	-	-	-	501	1821	750
D1P15A	R. dentocariosa	3723	1614	834	747	2955	1245	-	342	2688	2412	1169	660	639	954	519	489	1380	690	-	1269	1071	213	960	1239	792	1623	648	-	1659	-	-	-	501	1821	750
D1P17	R. dentocariosa	3723	1614	834	747	2955	1245	-	342	2688	2412	1169	660	639	825	519	489	1380	690	-	1269	1071	213	960	1239	792	1623	648	1674	1659	-	-	-	501	1821	750
D3T4	R. mucilaginosa	3720	1614	834	741	2895	1221	-	327	2670	2418	1181	657	-	798	-	507	1380	708	519	1314	-	213	960	1239	795	1629	645	1674	-	1638	1623	1623	501	1803	750
D4P7	R. dentocariosa	3723	1614	747	834	2955	1245	-	342	2688	2412	1169	660	639	822	519	1380	492	762	-	1269	1071	213	960	1239	792	1623	648	-	-	1659	1659	-	501	1821	750
D4T4	R. mucilaginosa	3720	1614	741	834	2895	1221	-	327	2670	2418	1181	657	-	807	-	1380	507	693	519	1314		213	960	1239	795	1638	645	1674	-	1623	1623	1638	501	1803	750
D4T6	R. mucilaginosa	3720	1614	834	741	2895	1221	-	327	2670	2418	1181	657	-	807	-	507	1380	693	519	1314	-	213	960	1239	795	1638	645	1674	-	1638	1638	1623	501	1803	750
D4T9	R. mucilaginosa	3720	1614	741	834	2895	1221	-	255	2670	2418	1181	657	-	807	-	1380	507	693	519	1314	-	213	960	1239	795	1638	645	1674	-	1623	1623	1638	501	1803	750
D5T11*	R. dentocariosa	-	-	-	-	2895	-		-	2670	-	-	657	-	-	-	-	-	-	-	-	-	-	960	-	-	-	-	-	-	-	-	-	-	-	-
* Incomplete genome
